# Supplementary material for: Spanish Cross-Cultural Adaptation and Validation of Neck Bournemouth Questionnaire (NBQ) for Neck Pain Patients
Source: MDPI journal article supplement (doi:10.3390/healthcare11131926), 2023-07-03
Supplement: s1 [file s1]

## NECK BOURNEMOUTH QUESTIONNAIRE PARA DOLOR CERVICAL

Nombre y apellido:

Fecha:

---

Las siguientes preguntas han sido diseñadas para conocer su dolor de cuello y cómo le está afectando. Por favor, responda a todas las preguntas marcando con un círculo un número en cada escala numérica que mejor describa cómo se siente:

1. Durante la última semana, ¿cómo calificarías de media tu dolor de cuello?

Sin dolor

Peor dolor posible

0      1      2      3      4      5      6      7      8      9      10

2. Durante la última semana, ¿en qué medida te ha molestado el dolor de cuello en tus actividades cotidianas (tareas domésticas, lavarse, vestirse, levantar peso, leer, conducir)?

Sin molestias

Imposibilidad de realizar actividades

0      1      2      3      4      5      6      7      8      9      10

3. Durante la última semana, ¿en qué medida ha interferido el dolor de cuello en tu capacidad para participar en actividades recreativas, sociales y familiares?

Sin molestias

Imposibilidad de realizar actividades

0      1      2      3      4      5      6      7      8      9      10

4. Durante la última semana, ¿hasta qué punto te has sentido ansioso/a (tenso/a, irritable, con dificultad para concentrarte/relajarte)?

Nada ansioso

Extremadamente ansioso

0      1      2      3      4      5      6      7      8      9      10

5. Durante la última semana, ¿cómo de deprimido (abatido, triste, desanimado, pesimista, infeliz) te has sentido?

Nada deprimido

Extremadamente deprimido

0      1      2      3      4      5      6      7      8      9      10

6. Durante la última semana, ¿has sentido que tu trabajo (tanto dentro como fuera de casa) ha afectado (o afectaría) a tu dolor de cuello?

No lo ha empeorado

Lo ha empeorado mucho

0      1      2      3      4      5      6      7      8      9      10

7. Durante la última semana, ¿hasta qué punto has podido controlar (reducir/ayudar) tu dolor de cuello por ti mismo?

Controlado completamente

Sin control alguno

0      1      2      3      4      5      6      7      8      9      10
